# Supplementary material
Source: PubMed Central journal article supplement (PMC8722786)
Supplement: ASN.2021010101SupplementaryData1.pdf [file ASN.2021010101SupplementaryData1.pdf]

1 **SUPPLEMENTAL MATERIAL**

2

3 Supplemental Table 1. ADPKD patient information.

4 Supplemental Table 2. Annotation of p-CREB binding peaks in DBA+ cells from  
5 ADPKD kidney.

6 Supplemental Table 3. Comparison of differentially expressed genes in DBA+ cells  
7 from WT and ADPKD mice treated with or without 666-15.

8 Supplemental Figure 1. Phosphorylation of CREB increases steadily in ADPKD  
9 kidneys.

10 Supplemental Figure 2. Comparison of p-CREB CUT&RUN and ChIP-seq.

11 Supplemental Figure 3. Comparison of H3K4me3 CUT&RUN and ChIP-seq.

12 Supplemental Figure 4. Function enrichment analysis of p-CREB binding genes.

13 Supplemental Figure 5. Inhibition of CREB transactivity by 666-15 treatment.

14 Supplemental Figure 6. p-CREB target genes previously reported as cystogenesis-  
15 associated genes.

16 Supplemental Figure 7. 666-15 suppresses cystic cell proliferation in the early-onset  
17 model.

18 Supplemental Figure 8. Inhibition of CREB by overexpressing A-CREB.

19 Supplemental Figure 9. 666-15 suppresses cystic cell proliferation in the kidney-  
20 specific mouse model.

21

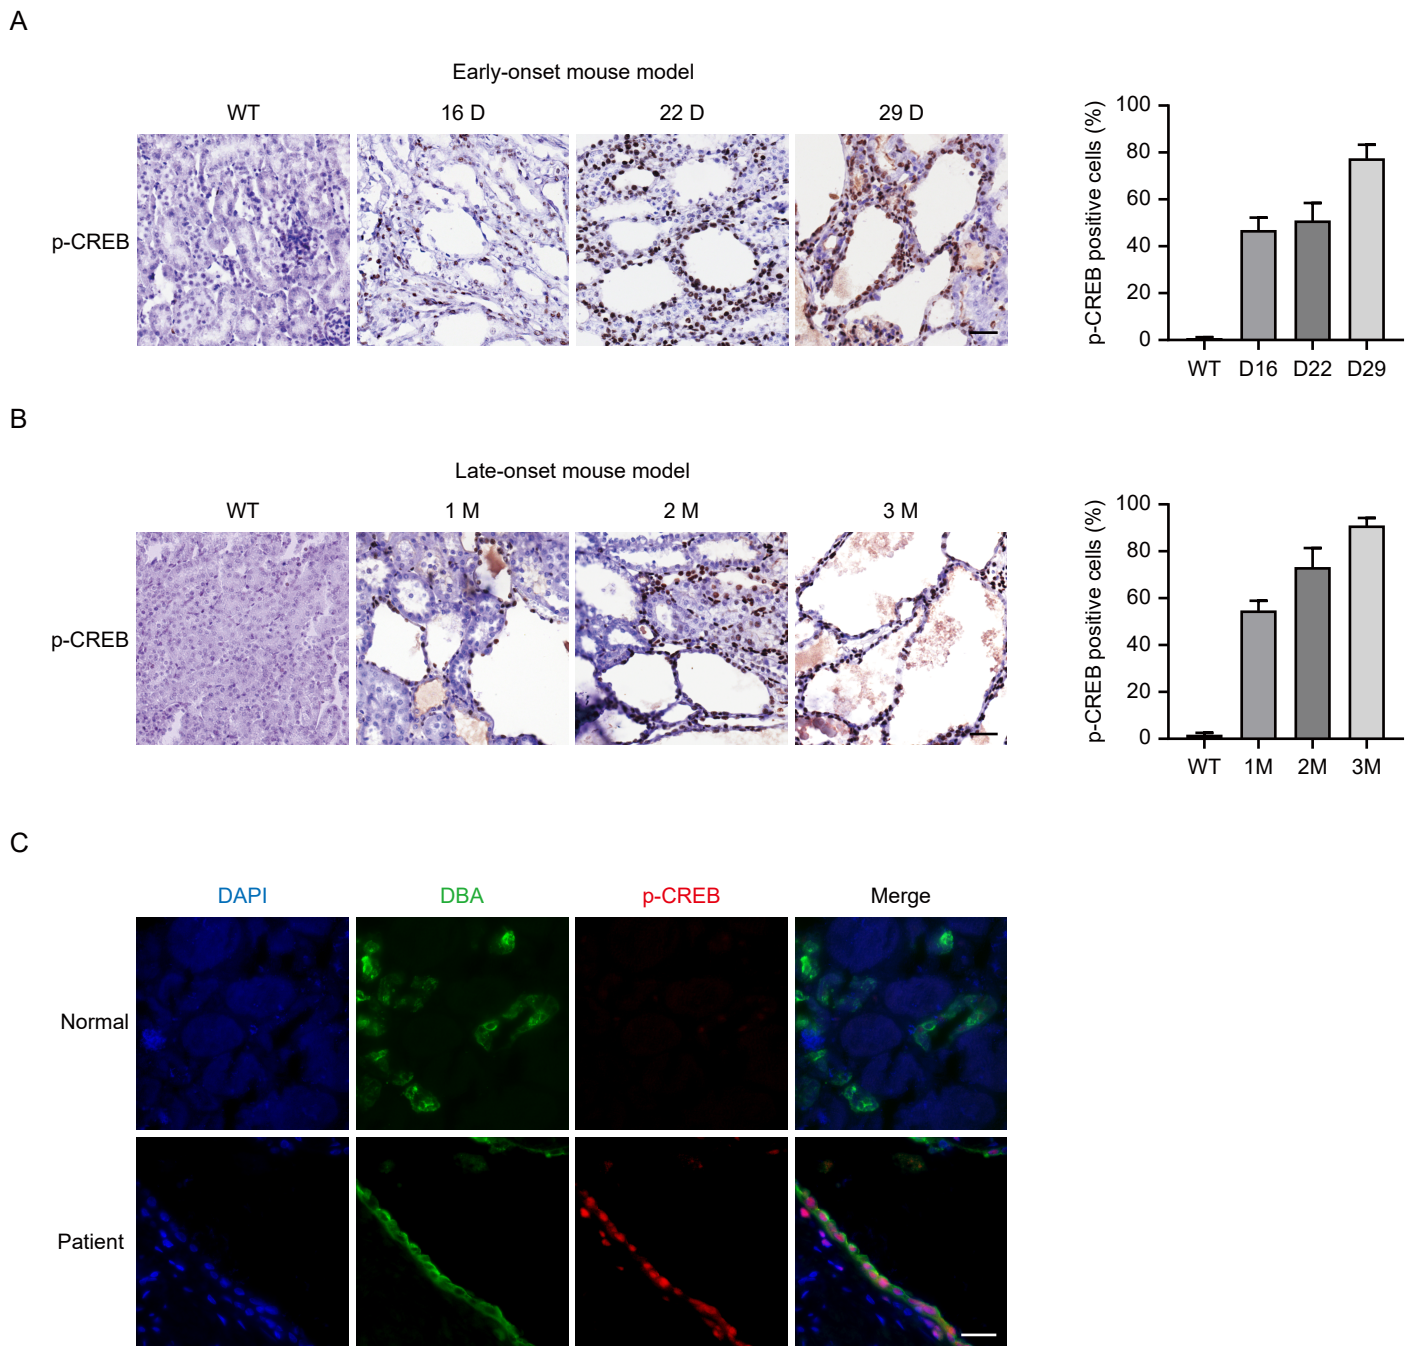

Supplemental Figure 1. Phosphorylation of CREB increases steadily in ADPKD kidneys. (A and B) Immunostaining of p-CREB in kidney sections from early-onset (A) or late-onset (B) ADPKD mouse model at the indicated times. The proportion of p-CREB-positive cells in normal tubular or cystic epithelial cells were counted. (C) Immunofluorescence analysis of p-CREB level in normal kidneys and kidneys from ADPKD patient. Scale bars represent 50  $\mu\text{m}$  in A and B (200 $\times$  magnification), 25  $\mu\text{m}$  in C (650 $\times$  magnification).

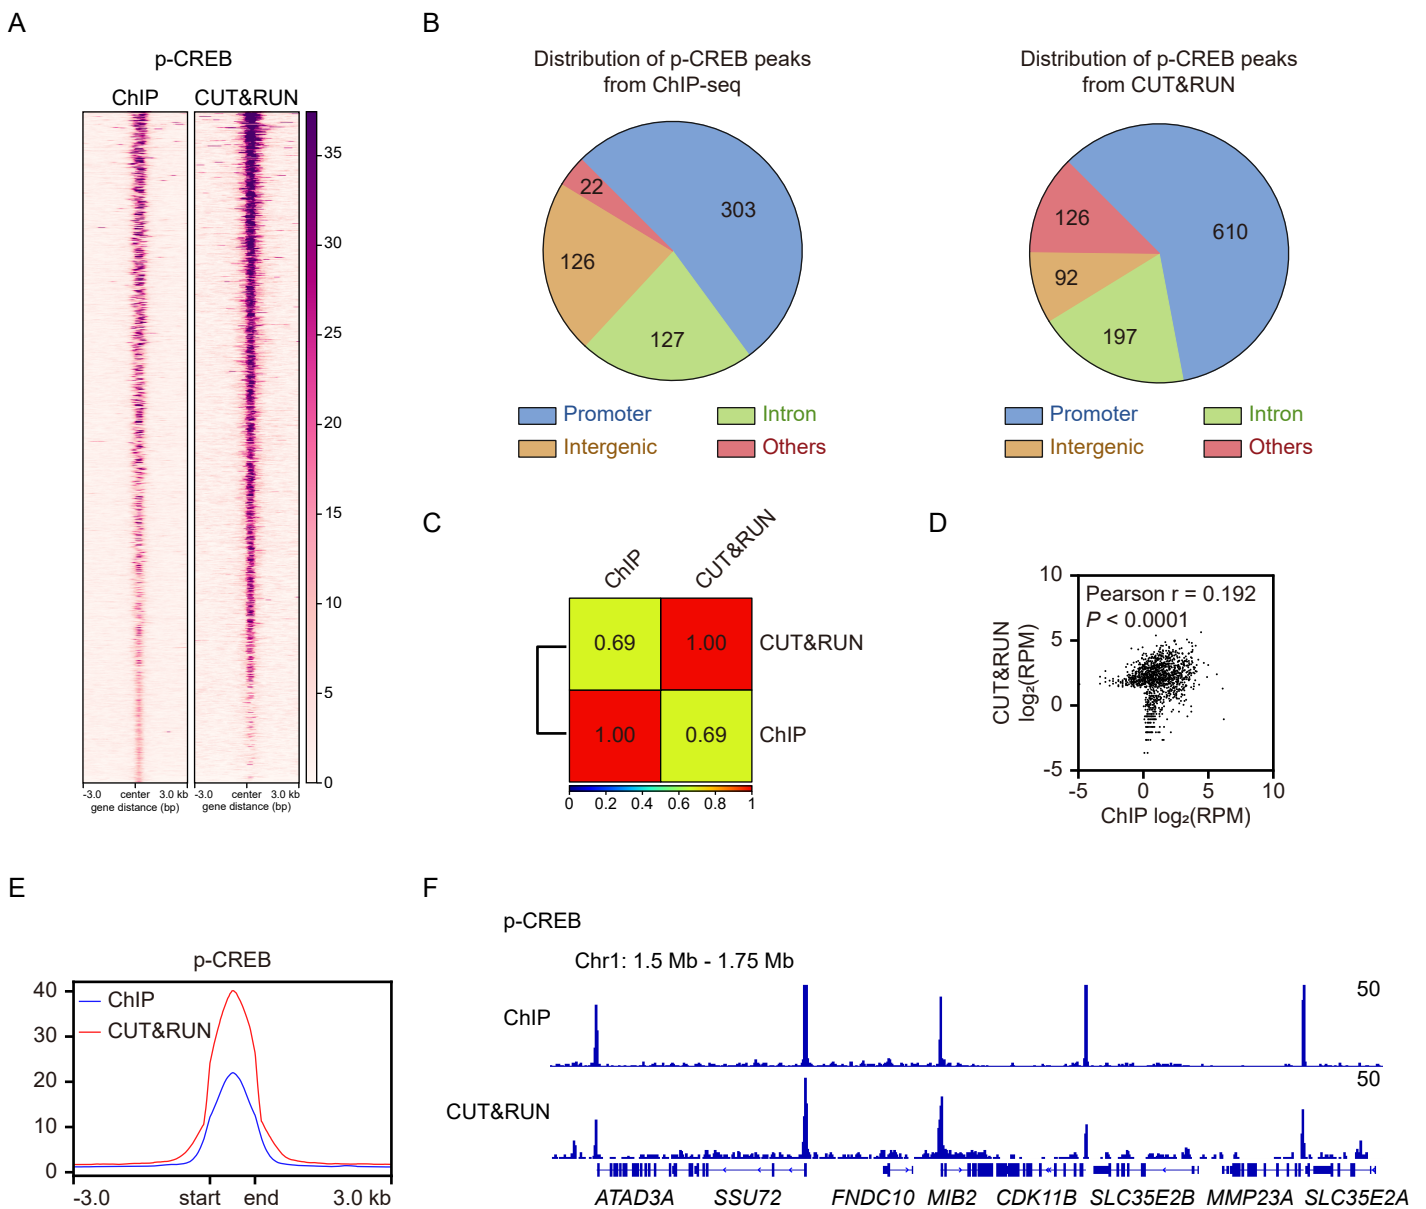

Supplemental Figure 2. Comparison of p-CREB CUT&RUN and ChIP-seq. (A) Heatmap of normalized p-CREB signals from ChIP-seq or CUT&RUN in WT 9-12 cells ( $n = 1$ ). (B) Genomic distribution of p-CREB peaks from ChIP-seq or CUT&RUN. (C) Pearson correlation matrix between p-CREB ChIP-seq and CUT&RUN. (D) Dot plots of p-CREB signals from ChIP-seq and CUT&RUN. (E) Composite plots of normalized p-CREB signals from ChIP-seq or CUT&RUN in WT 9-12 cells. (F) Representative ChIP-seq and CUT&RUN tracks of p-CREB.

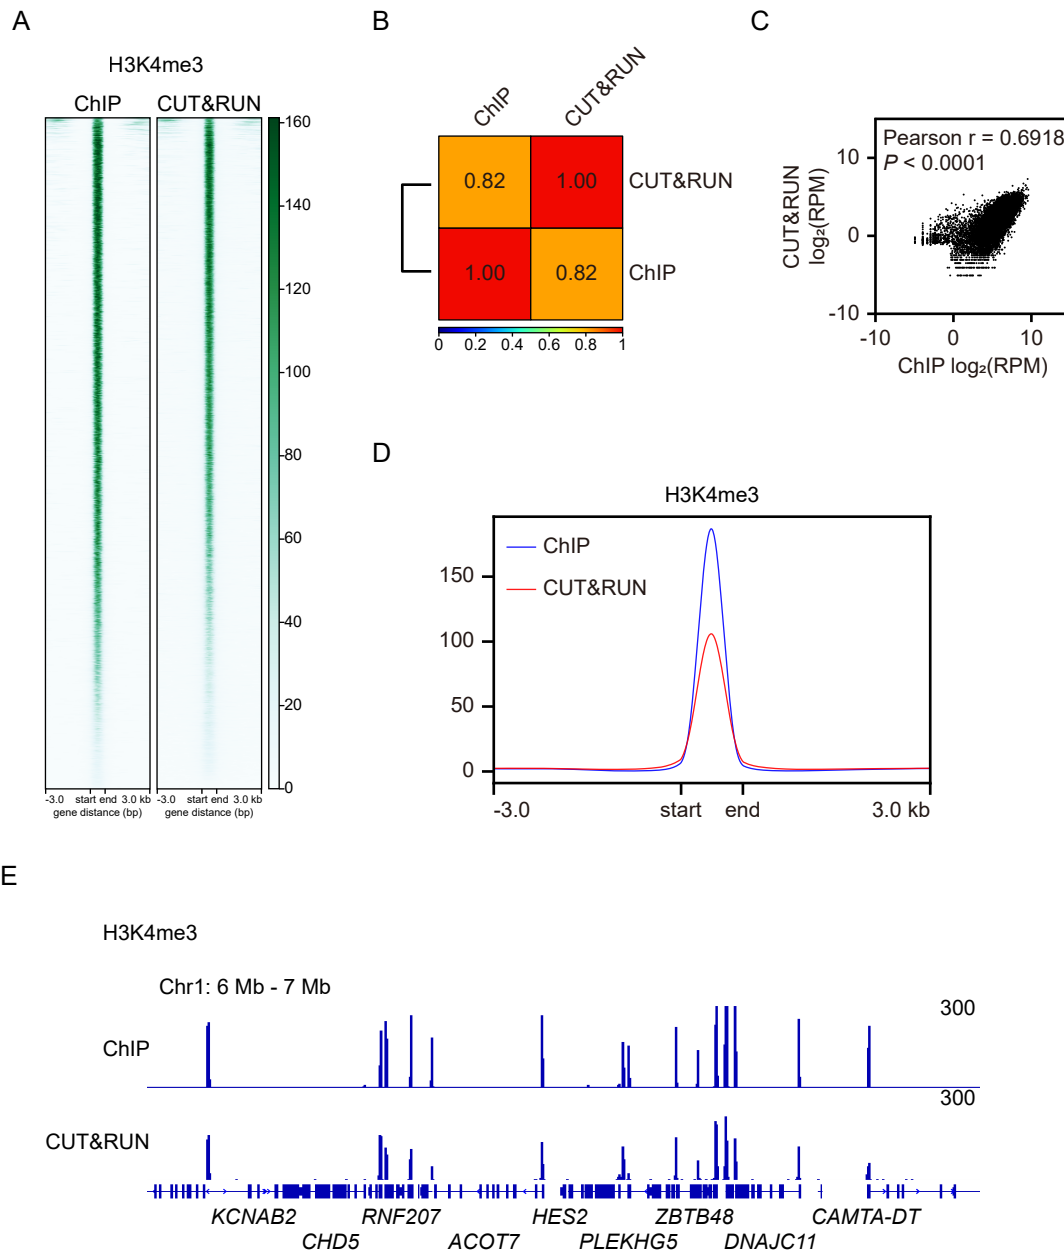

Supplemental Figure 3. Comparison of H3K4me3 CUT&RUN and ChIP-seq. (A) Heatmap of normalized H3K4me3 signals from ChIP-seq or CUT&RUN in WT 9-12 cells ( $n = 1$ ). (B) Pearson correlation matrix between H3K4me3 ChIP-seq and CUT&RUN. (C) Dot plots of H3K4me3 signals from ChIP-seq and CUT&RUN. (D) Composite plots of normalized H3K4me3 signals from ChIP-seq or CUT&RUN in WT 9-12 cells. (E) Representative ChIP-seq and CUT&RUN tracks of H3K4me3.

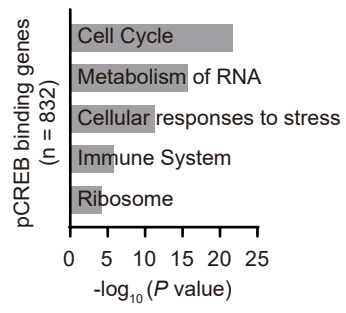

Supplemental Figure 4. Function enrichment analysis of p-CREB binding genes.

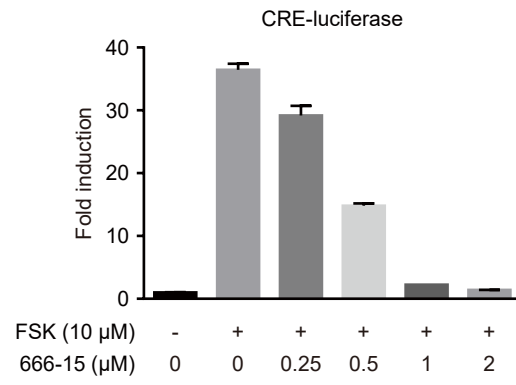

Supplemental Figure 5. Inhibition of CREB transactivity by 666-15 treatment. CRE-luciferase activity in 293T cells with 666-15 and forskolin (FSK) treatment.

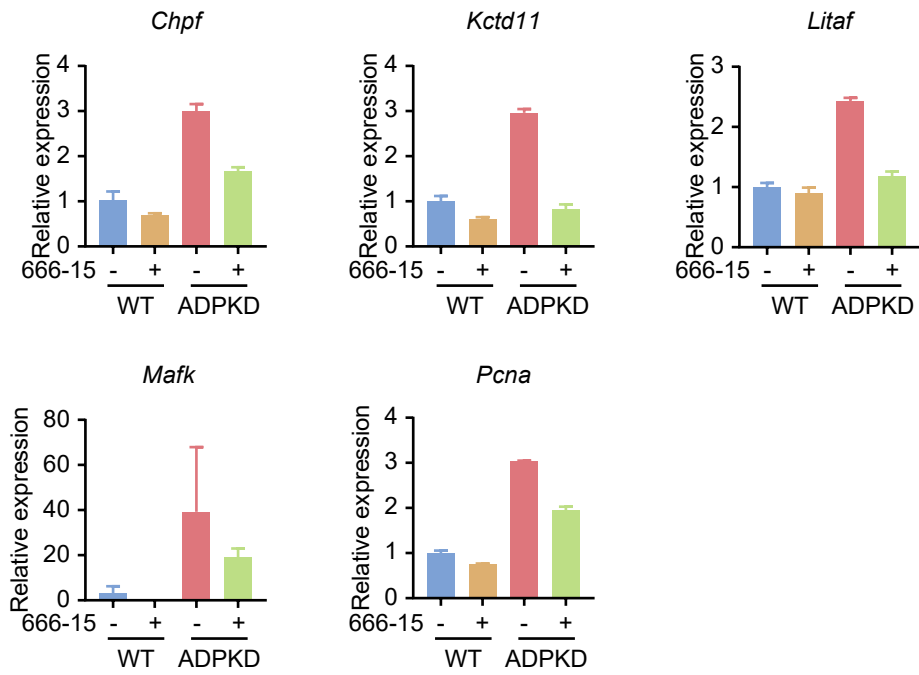

Supplemental Figure 6. p-CREB target genes previously reported as cystogenesis-associated genes. qPCR validation of previously reported cystogenesis-associated genes in DBA-positive cells from the indicated groups.

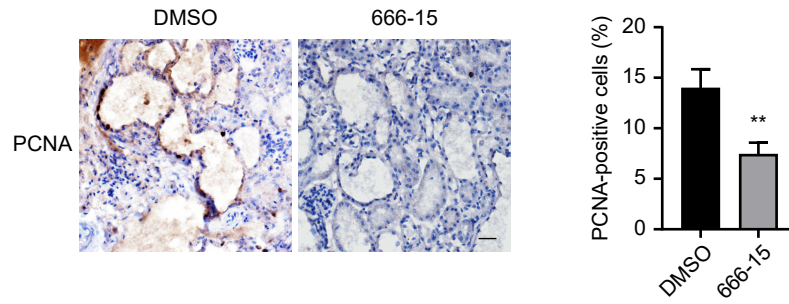

Supplemental Figure 7. 666-15 suppresses cystic cell proliferation in the early-onset model. Immunohistochemistry analysis of PCNA level in kidney sections from early-onset ADPKD mice treated with DMSO or 666-15. Proportion of PCNA-positive cells in cystic epithelial cells was determined. \*\*  $P < 0.01$ . Scale bar represents 50  $\mu\text{m}$  (200 $\times$  magnification).



A

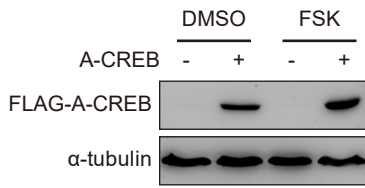

B

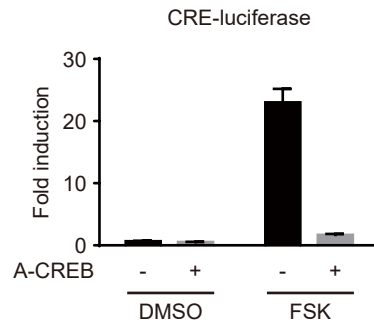

C

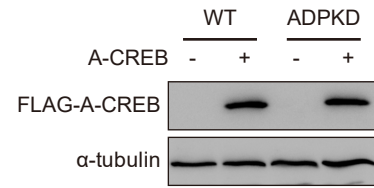

Supplemental Figure 8. Inhibition of CREB by overexpressing A-CREB. (A) WB analysis of overexpressed FLAG-A-CREB in 293T cells. (B) CRE-luciferase activity in 293T cells from the indicated groups. (C) WB analysis of FLAG-A-CREB in mice from the indicated groups.

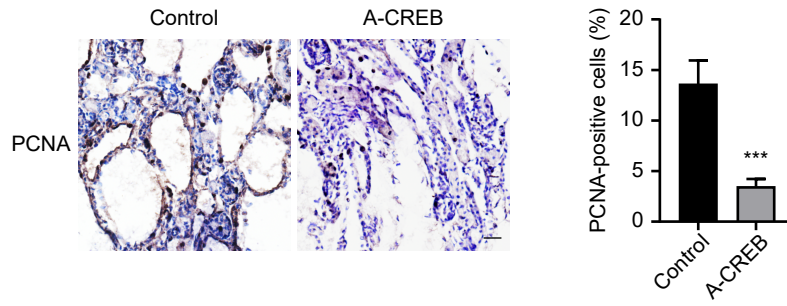

Supplemental Figure 9. 666-15 suppresses cystic cell proliferation in the kidney-specific mouse model. Immunohistochemistry analysis of PCNA level in kidney sections from ADPKD mice with or without A-CREB expression. Proportion of PCNA-positive cells in cystic epithelial cells was determined. \*\*\*  $P < 0.001$ . Scale bar represents 50  $\mu\text{m}$  (200 $\times$  magnification).
